# Supplementary material for: Implementation of the Blended Care Self-Management Program for Caregivers of People With Early-Stage Dementia (Partner in Balance): Process Evaluation of a Randomized Controlled Trial
Source: PubMed Central journal article supplement (PMC5750419; doi:10.2196/jmir.7666), 2017-12-19
Supplement: jmir_v19i12e423_app1.pdf [file jmir_v19i12e423_app1.pdf]

## Multimedia appendix 1. Structured registration form coaches Partner in Balance

Participant number: \_\_\_\_\_

| Action undertaken                                                                                                                                                                                                                                                                                                         | Date | Time spent | (If applicable)<br>Who took initiative? | Topics discussed | Other remarks |
|---------------------------------------------------------------------------------------------------------------------------------------------------------------------------------------------------------------------------------------------------------------------------------------------------------------------------|------|------------|-----------------------------------------|------------------|---------------|
| Preparation <ul style="list-style-type: none"> <li>- Attending coach training</li> <li>- Reading protocol</li> <li>- Attending coach intervision meetings</li> </ul>                                                                                                                                                      |      |            |                                         |                  |               |
| Intake session <ul style="list-style-type: none"> <li>- Getting acquainted</li> <li>- Needs assessment</li> <li>- Setting GAS goals</li> <li>- Choosing modules + adding modules to account</li> <li>- Explaining online procedure</li> <li>- Contact moment agreements</li> <li>- Providing login information</li> </ul> |      |            |                                         |                  |               |
| Online period <ul style="list-style-type: none"> <li>- Responding to online assignments (email)</li> <li>- Other online help (support requests, reminders)</li> <li>- Telephone contacts (if applicable)</li> </ul>                                                                                                       |      |            |                                         |                  |               |
| Evaluation session <ul style="list-style-type: none"> <li>- General evaluation of modules and experience with the program</li> <li>- Evaluating GAS goals</li> <li>- Identify need for additional modules or types of aid</li> </ul>                                                                                      |      |            |                                         |                  |               |
