# Supplementary material for: Implementation of the Blended Care Self-Management Program for Caregivers of People With Early-Stage Dementia (Partner in Balance): Process Evaluation of a Randomized Controlled Trial
Source: PubMed Central journal article supplement (PMC5750419; doi:10.2196/jmir.7666), 2017-12-19
Supplement: jmir_v19i12e423_app2.pdf [file jmir_v19i12e423_app2.pdf]

## Multimedia appendix 2: Coach questionnaire

|                                                                                                                                                                                                                 | Completely disagree | Disagree | Neutral | Agree | Completely agree |
|-----------------------------------------------------------------------------------------------------------------------------------------------------------------------------------------------------------------|---------------------|----------|---------|-------|------------------|
| 1. The program is feasible for coaches                                                                                                                                                                          | 1                   | 2        | 3       | 4     | 5                |
| 2. I can combine the coach responsibilities with my usual activities                                                                                                                                            | 1                   | 2        | 3       | 4     | 5                |
| 3. The program is a valuable contribution for caregivers                                                                                                                                                        | 1                   | 2        | 3       | 4     | 5                |
| 4. The program is a valuable contribution for coaches/professionals                                                                                                                                             | 1                   | 2        | 3       | 4     | 5                |
| 5. Was the program delivered according to protocol (in +/- 8 weeks, feedback after each module, face-to-face intake and evaluation session). If not, what was performed inconsistent with the protocol and why? |                     |          |         |       |                  |
| 6. How much time, on average, did you spent coaching one participant? (Based on the structured registration form)                                                                                               |                     |          |         |       |                  |
| 7. What are the advantages of the program?                                                                                                                                                                      |                     |          |         |       |                  |
| 8. What are the disadvantages of the program? Points for improvement?                                                                                                                                           |                     |          |         |       |                  |

### Implementation

9. What are the barriers for implementation of the program in your organization?
10. What could be possible facilitators for future implementation of the program within your organization?
